# Supplementary material
Source: PubMed Central journal article supplement (PMC2002623)
Supplement: plntcell_tpc.107.053199_1.pdf [file plntcell_tpc.107.053199_1.pdf]

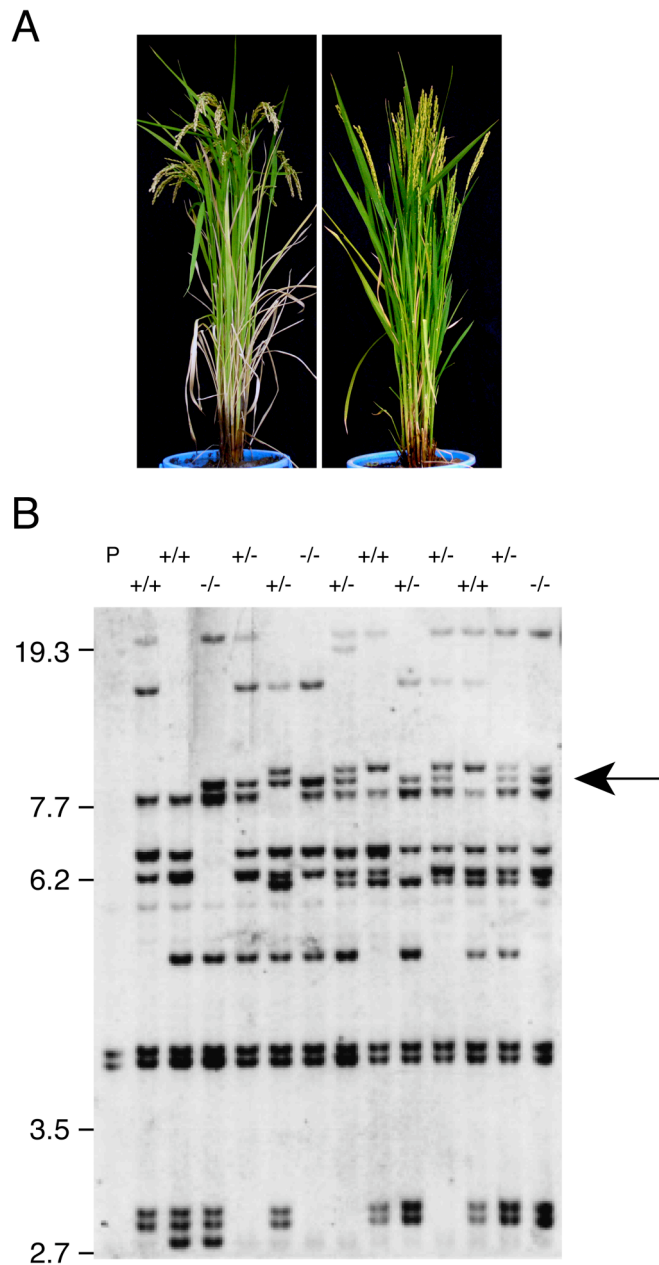

**Supplemental Figure 1.** Genetic linkage analysis for the *mell-1* sterile phenotype and *Tos17* insertion.

**(A)** Plant types of the +/- fertile (left) and the -/- sterile plants (right).

**(B)** Example of Southern-blot linkage analysis for the *mell-1* sterile phenotype and transposed *Tos17* fragments. The original variety, cv. Nipponbare, had two copies of *Tos17* (lane P), and the R4 plants contained 10 or more additional copies. The 8-kbp band (arrow) cosegregated with the mutant alleles +/- and -/-.
