# Supplementary material
Source: PubMed Central journal article supplement (PMC2002623)
Supplement: plntcell_tpc.107.053199_2.pdf [file plntcell_tpc.107.053199_2.pdf]

**A**

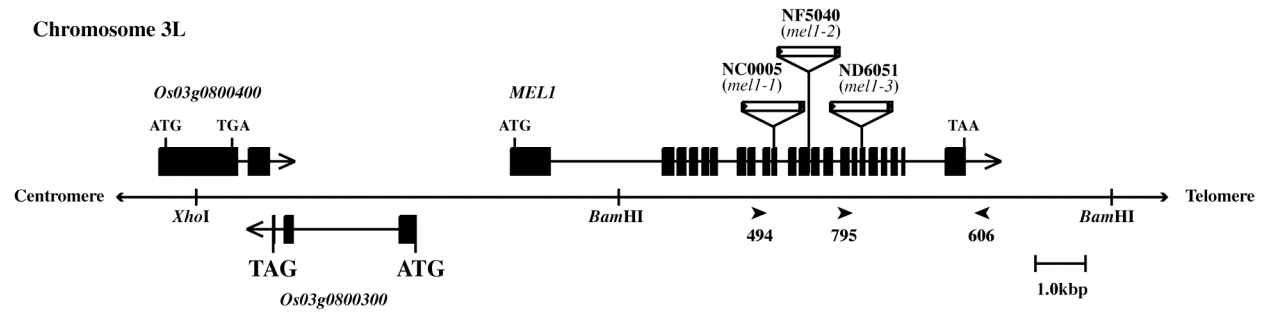

**B**

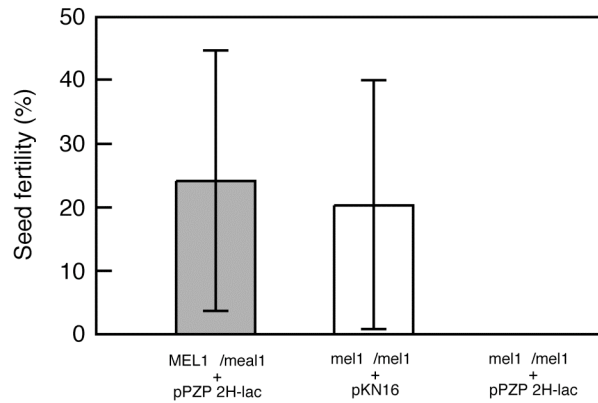

**C**

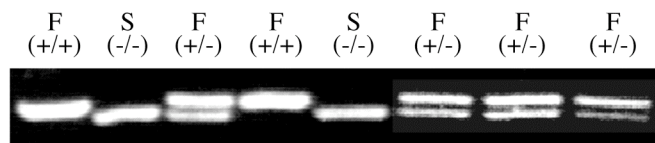

**Supplemental Figure 2.** Genomic structure of the *MEL1* gene.

(A) Genomic structure around the *MEL1* locus on the long arm end of chromosome 3.

Arrowheads beneath the thin horizontal line, representing the genomic sequence, indicate the primers used in PCR genotyping and/or RT-PCR.

(B) The *MEL1* genomic sequence could recover the sterility caused by the *mel1-1* mutation. (C)

Two allelic PCR products using a mixture of 494, 606 and T17LTR2MR primers can be used to identify the *MEL1* locus genotype.
