# Supplementary material
Source: PubMed Central journal article supplement (PMC2002623)
Supplement: plntcell_tpc.107.053199_4.pdf [file plntcell_tpc.107.053199_4.pdf]

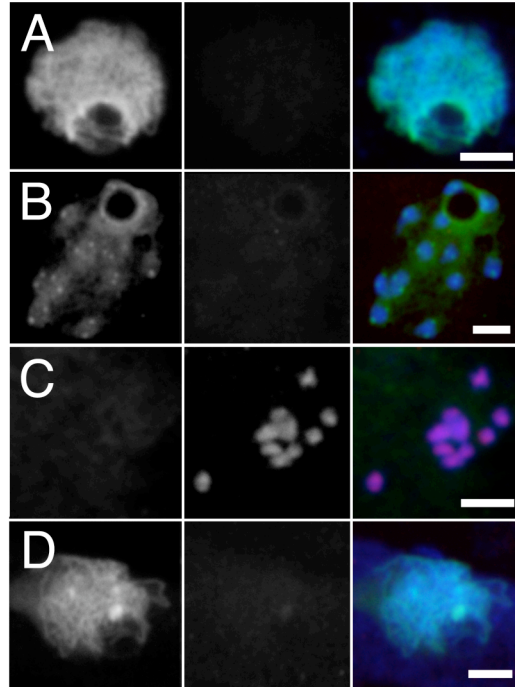

**Supplemental Figure 4.** PMCs of the *mel1-1* mutant were arrested at early meiosis I.

Indirect immunofluorescence of phosphorylated PAIR2 (left), H3S10 (middle), and a merged image (right). In wild-type PMCs, PAIR2 protein associated with meiotic chromosome axes during leptotene (**A**), dissociated at diakinesis (**B**), and disappeared at metaphase I (**C**). In contrast, phosphorylation of H3S10 had been detected over the entire length of chromatin at and after early metaphase I (**C**), but not in earlier stages (**A**, **B**). In all mutant PMCs carrying uncondensed chromosomes, PAIR2 normally associated with chromosomes, but any H3S10s were only phosphorylated to a small extent (**D**). Scale bars indicate 5  $\mu\text{m}$ .
